# Supplementary material
Source: Springer Nature journal article supplement (https://springermedizin.de/resource/supplementary/13063_2010_589_MOESM1_ESM.pdf/9618820)
Supplement: MOESM1 [file 9618820]

Patients with fibromyalgia referred by their GPs

Check inclusion criteria and offer the study

Excluded  
- Not meeting inclusion criteria  
- Refusing to participate

Agree to participate

Randomisation  
1:1

Allocated to Real Acupuncture

Allocated to Sham Acupuncture

9 treatment sessions (one per week)

Final evaluation of results (10 weeks after start of treatment)

Evaluation of T2 follow-up (6 months after start of treatment)

Evaluation of T3 follow-up (12 months after start of treatment)
